# Supplementary material for: Interplay between A-site and oxygen-vacancy ordering, and mixed electron/oxide-ion conductivity in n = 1 Ruddlesden–Popper perovskite Sr 2 Nd 2 Zn 2 O 7
Source: Royal Society of Chemistry journal article supplement (doi:10.1039/d4sc05323k), 2024-12-17
Supplement: d4sc05323k1.pdf [file d4sc05323k1.pdf]

# Interplay between A-site and oxygen-vacancy ordering, and mixed electron/oxide-ion conductivity in $n = 1$ Ruddlesden–Popper perovskite $\text{Sr}_2\text{Nd}_2\text{Zn}_2\text{O}_7$

Danhe Li,<sup>a,#</sup> Guangxiang Lu,<sup>a,#</sup> Zien Cheng,<sup>a</sup> Maxim Avdeev,<sup>\*b,c</sup> Jungu Xu,<sup>d</sup> Zhengyang Zhou,<sup>e</sup> Rihong Cong,<sup>a</sup> Tao Yang,<sup>\*a</sup> Pengfei Jiang<sup>\*a</sup>

<sup>a</sup>College of Chemistry and Chemical Engineering, Chongqing University, Chongqing 401331, China.

<sup>b</sup>Australian Nuclear Science and Technology Organisation, Lucas Height, NSW 2234, Australia.

<sup>c</sup>School of Chemistry, The University of Sydney, Sydney, NSW 2006, Australia.

<sup>d</sup>College of Materials Science and Engineering, Guilin University of Technology, Guilin, Guangxi 541004, China.

<sup>e</sup>Shanghai Institution of Ceramics, Chinese of Academy of Science, Shanghai 201899, China.

<sup>#</sup>These authors contributed equally to the manuscript.

\*Corresponding authors: max@ansto.gov.au; taoyang@cqu.edu.cn; pengfeijiang@cqu.edu.cn.

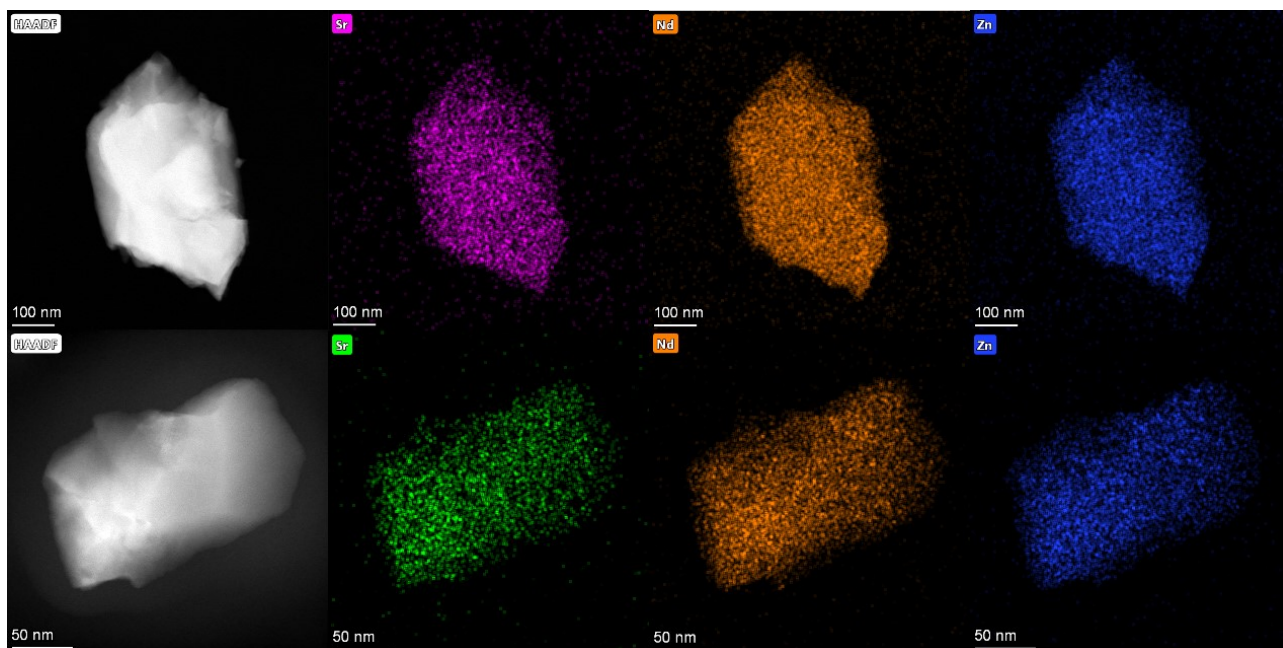

**Fig. S1** TEM maps and elemental mapping images for  $\text{Sr}_2\text{Nd}_2\text{Zn}_2\text{O}_7$ .

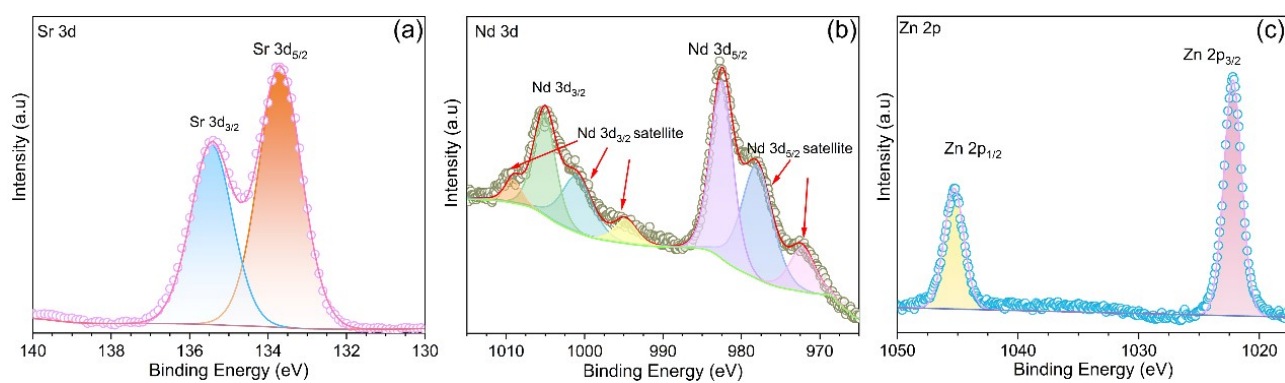

**Fig. S2** High-resolution XPS spectra for Sr 3d (a), Nd 3d (b), and Zn 2p (c)

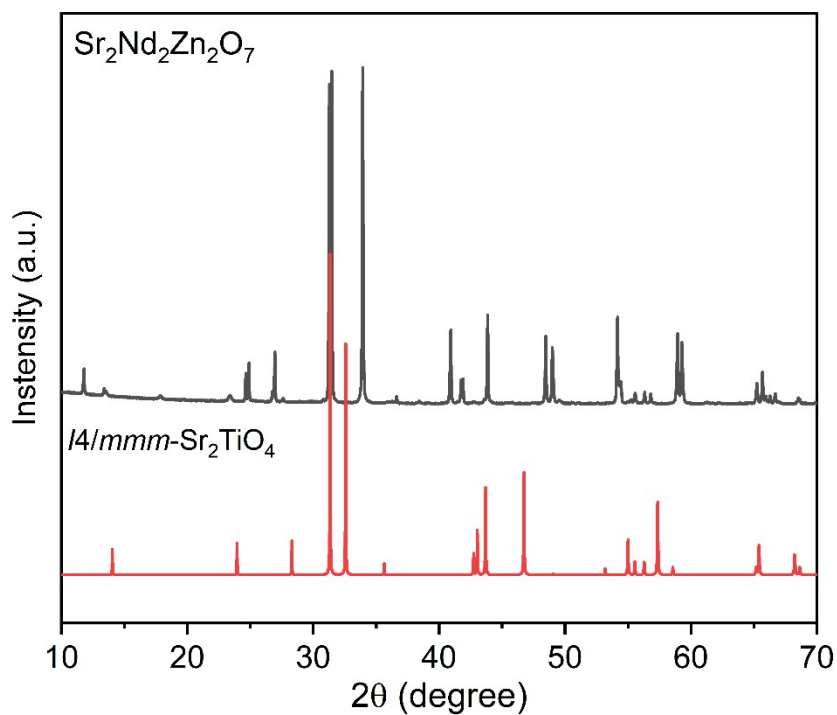

**Fig. S3** The PXRD pattern for  $\text{Sr}_2\text{Nd}_2\text{Zn}_2\text{O}_7$ . A simulated PXRD pattern of  $I4/mmm\text{-Sr}_2\text{TiO}_4$  is given in the pattern for comparison.

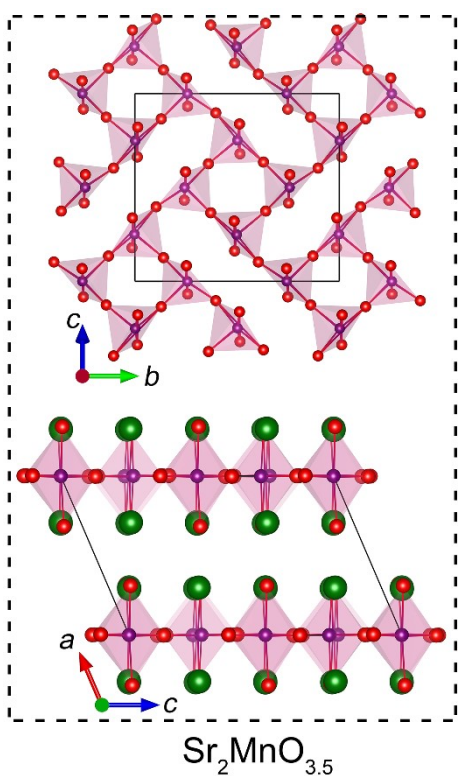

**Fig. S4** Crystal structure of oxygen-vacancy ordered  $\text{Sr}_2\text{MnO}_{3.5}$ .

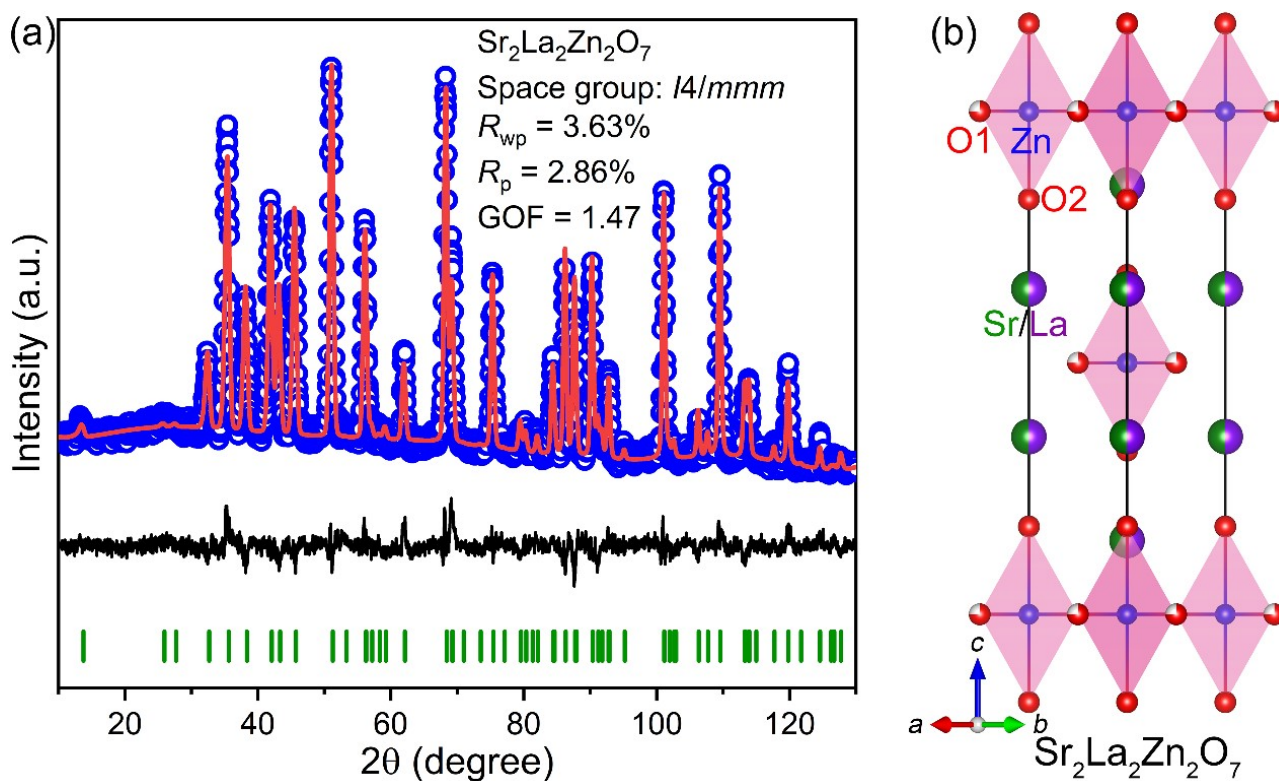

**Fig. S5** (a) Rietveld refinement plots of high-resolution NPD data for  $\text{Sr}_2\text{La}_2\text{Zn}_2\text{O}_7$ . (b) Crystal structure of  $\text{Sr}_2\text{La}_2\text{Zn}_2\text{O}_7$  viewed along the  $[110]$  direction.

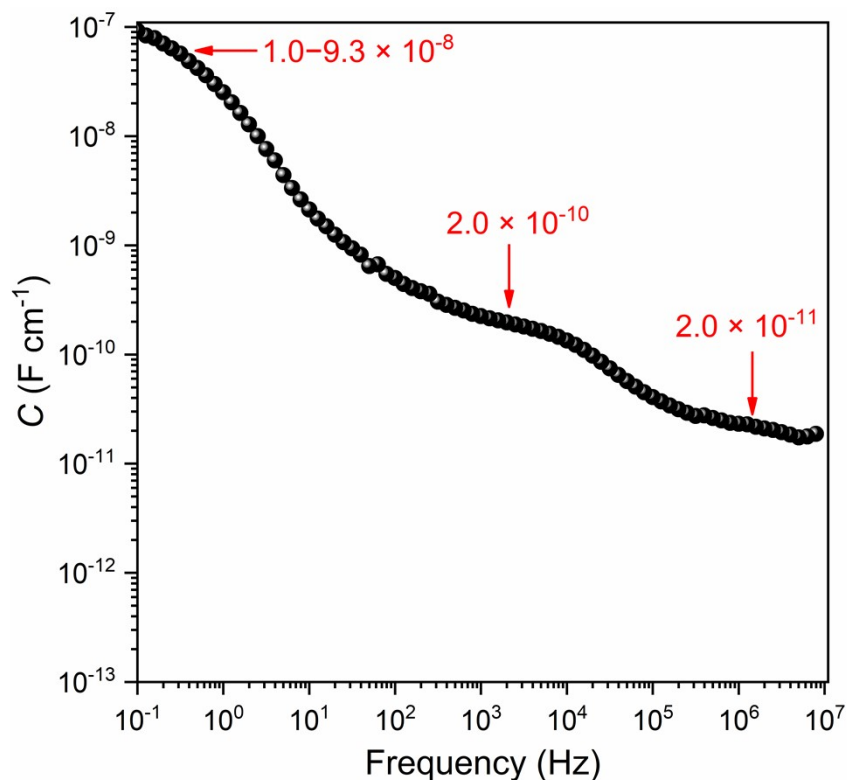

**Fig. S6** Plots of frequency as a function of frequency. The corresponding impedance data were recorded at  $550\text{ }^\circ\text{C}$  under dry air conditions.

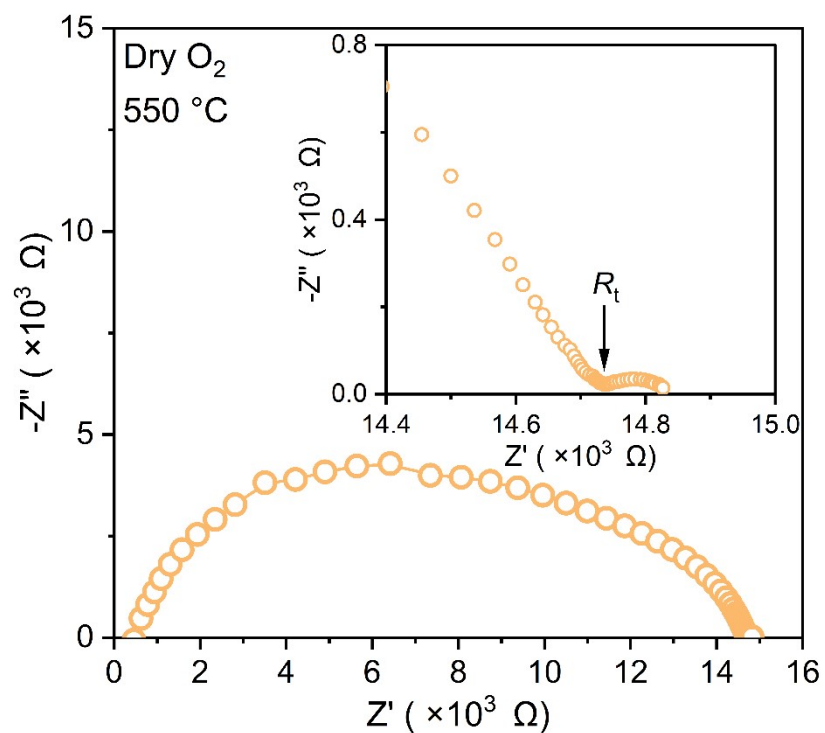

Fig. S7 Complex impedance spectra of Sr<sub>2</sub>La<sub>2</sub>Zn<sub>2</sub>O<sub>7</sub> recorded at 550 °C under O<sub>2</sub> atmospheres.

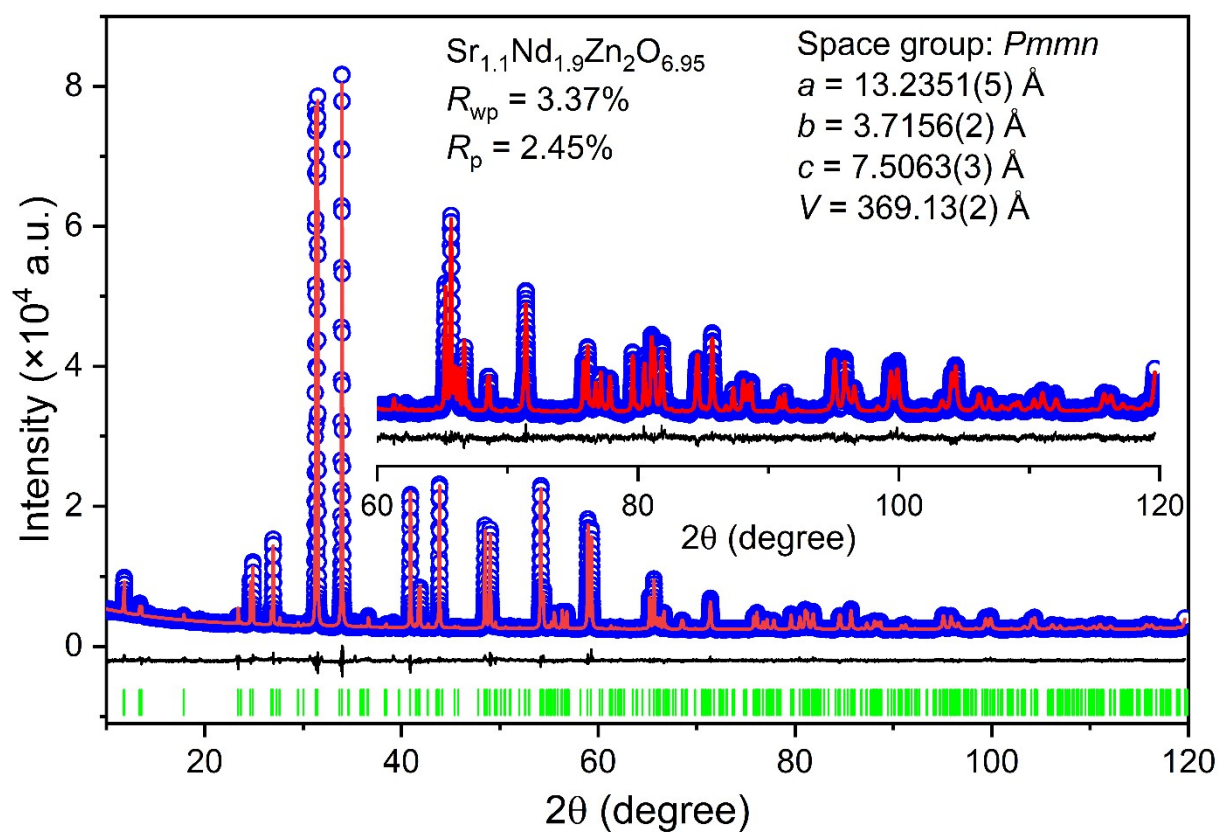

Fig. S8 Rietveld refinement plot of PXRD data for Sr<sub>2.1</sub>Nd<sub>1.9</sub>Zn<sub>2</sub>O<sub>6.95</sub>.

**Table S1.** Selected Interatomic bond lengths in Sr<sub>2</sub>Nd<sub>2</sub>Zn<sub>2</sub>O<sub>7</sub>.

| bond       | length (Å) | bond       | length (Å) | bond       | length (Å) |
|------------|------------|------------|------------|------------|------------|
| Sr1–O5     | 2.418(7)   | Nd1–O4     | 2.392(6)   | Zn1–O1 × 2 | 1.922(6)   |
| Sr1–O2 × 2 | 2.6422(7)  | Nd1–O1     | 2.403(6)   | Zn1–O2     | 1.96(2)    |
| Sr1–O4 × 2 | 2.820(5)   | Nd1–O3     | 2.432(5)   | Zn1–O4 × 2 | 2.258(6)   |
| Sr1–O5 × 2 | 2.861(6)   | Nd1–O4 × 2 | 2.498(4)   | <Zn1–O>    | 2.064(9)   |
| Sr1–O3     | 3.022(7)   | Nd1–O5 × 2 | 2.500(5)   | BVS(Zn1)   | 1.99       |
| Sr1–O1     | 3.039(9)   | <Nd1–O>    | 2.461(5)   | Zn2–O2     | 1.86(2)    |
| <Sr1–O>    | 2.792(5)   | BVS(Nd1)   | 2.59       | Zn2–O3 × 2 | 1.908(5)   |
| BVS(Sr1)   | 1.59       |            |            | Zn2–O5 × 2 | 2.334(7)   |
|            |            |            |            | <Zn2–O>    | 2.070(9)   |
|            |            |            |            | BVS(Zn2)   | 2.05       |

**Table S2.** Atomic Coordinates, occupancies, Isotropic Thermal Displacement Factors of Sr<sub>2</sub>La<sub>2</sub>Zn<sub>2</sub>O<sub>7</sub> Obtained from Rietveld Refinement against NPD Data.

| atom  | site       | <i>x</i> | <i>y</i> | <i>z</i>  | Occ.    | <i>B</i> <sub>iso</sub> . (Å <sup>2</sup> ) |
|-------|------------|----------|----------|-----------|---------|---------------------------------------------|
| Sr/La | 4 <i>e</i> | 0        | 0        | 0.3538(1) | 0.5/0.5 | 0.69(5)                                     |
| Zn1   | 2 <i>a</i> | 0        | 0        | 0         | 1       | 1.05(8)                                     |
| O1    | 4 <i>c</i> | 0        | 0.5      | 0         | 0.75    | 2.6(1)                                      |
| O2    | 4 <i>e</i> | 0        | 0        | 0.1733(2) | 1       | 1.61(6)                                     |

**Table S3.** Selected Interatomic bond lengths in Sr<sub>2</sub>La<sub>2</sub>Zn<sub>2</sub>O<sub>7</sub>.

| bond         | length (Å) | bond      | length (Å) |
|--------------|------------|-----------|------------|
| Sr/La–O2     | 2.445(4)   | Zn–O1 × 4 | 1.8741(2)  |
| Sr/La–O2 × 4 | 2.6755(6)  | Zn–O2 × 4 | 2.347(3)   |
| Sr/La–O1 × 4 | 2.727(1)   |           |            |
